# Supplementary material
Source: Springer Nature journal article supplement (https://www.springerprofessional.de/resource/supplementary/13173_2013_3_MOESM6_ESM.pdf/11897022)

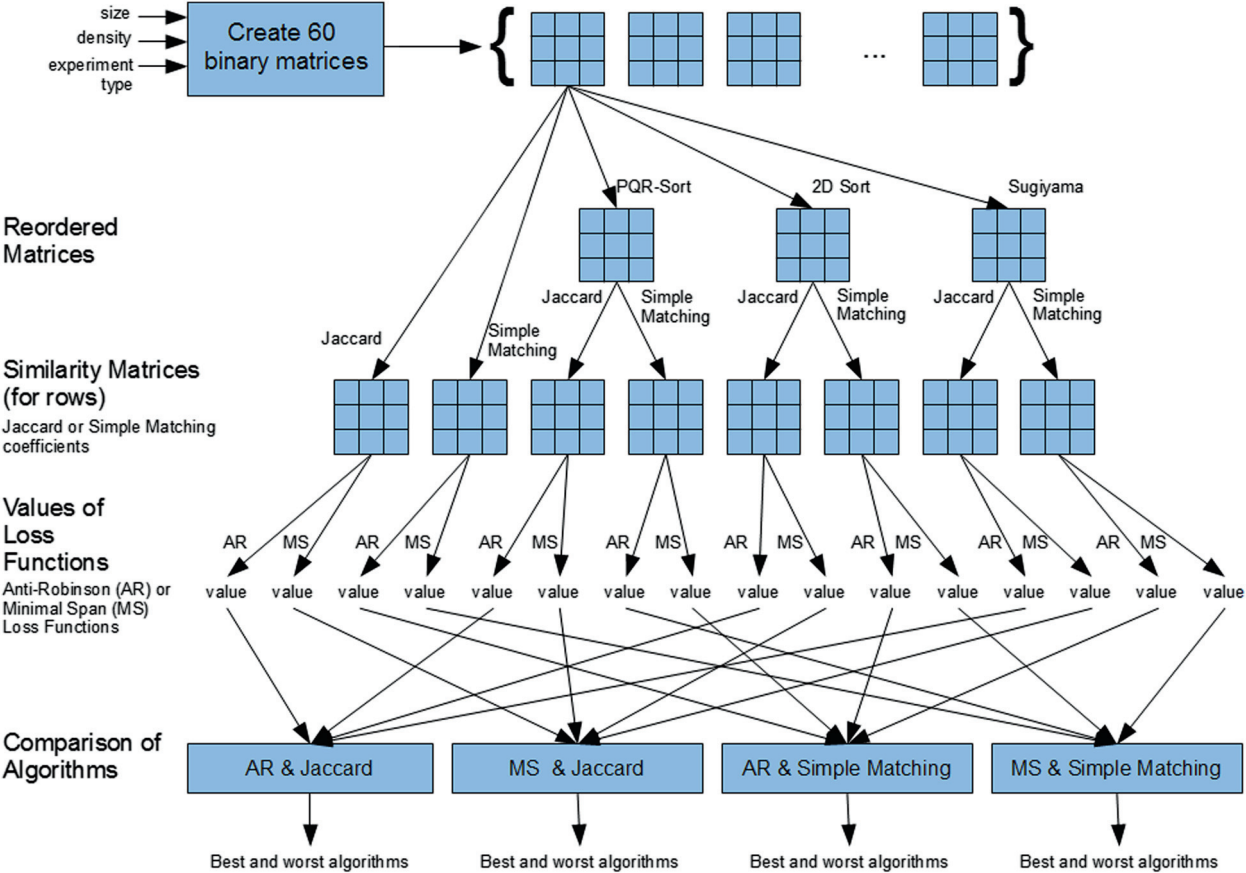

Supplement: MOESM6 [file 11897022]
